# Supplementary material for: Determination of chromium(iii) by differential pulse stripping voltammetry at a chitosan–gold nanocomposite modified screen printed electrode
Source: Royal Society of Chemistry journal article supplement (doi:10.1039/c5ay03291a), 2016-01-01

**Electronic Supplementary Information (ESI)**

**Determination of chromium(III) by differential pulse stripping voltammetry at a chitosan-gold nanocomposite modified screen printed electrode**

Shixin Wu,<sup>a</sup> Nadia Chandra Sekar,<sup>a</sup> Swee Ngin Tan,<sup>b</sup> Hong Xie<sup>a</sup>  
and Sum Huan Ng<sup>\*a</sup>

<sup>a</sup> Singapore Institute of Manufacturing Technology, 71 Nanyang Drive, Singapore 638075, Singapore. E-mail: shng@simtech.a-star.edu.sg; Tel: +65 67938382 (Dr. Sum Huan Ng).

<sup>b</sup> Natural Sciences and Science Education Academic Group, Nanyang Technological University, 1 Nanyang Walk, Singapore 637616, Singapore.

**Fig. S1** Typical cyclic voltammogram of an unmodified SPE in 0.1 M acetate buffer (pH 5.0). Scan rate: 50 mV/s.

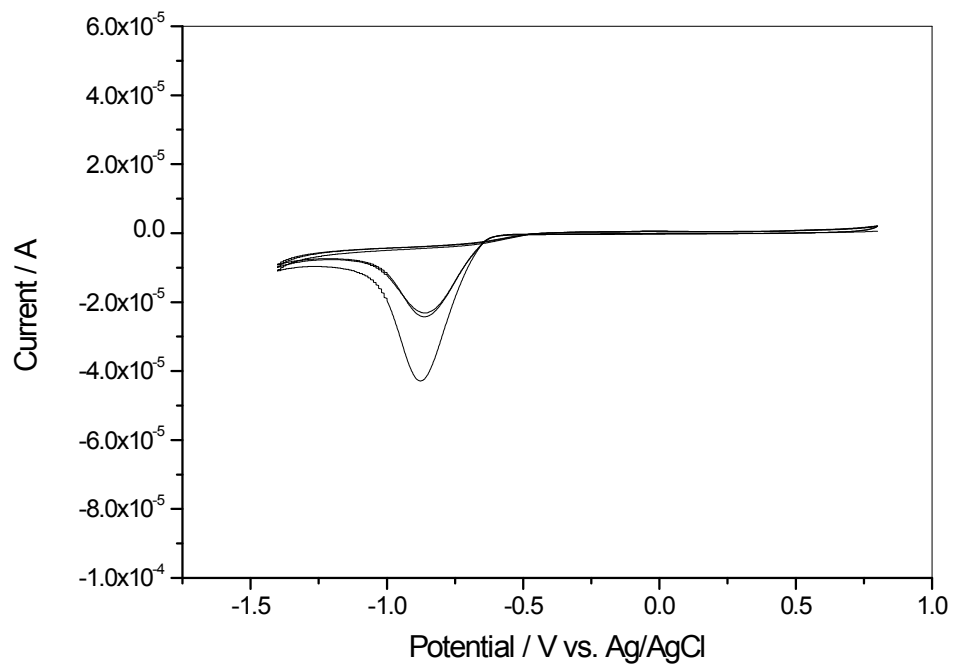

**Fig. S2** Differential pulse stripping voltammograms of SPE (dashed line) and Au-SPE (solid line) in 0.1 M acetate buffer (pH 5.0). Accumulation potential: -1.3 V; accumulation time: 360 s. Pulse amplitude: 50 mV, pulse width: 0.05 s, sample period: 0.1 s, step size: 2 mV.

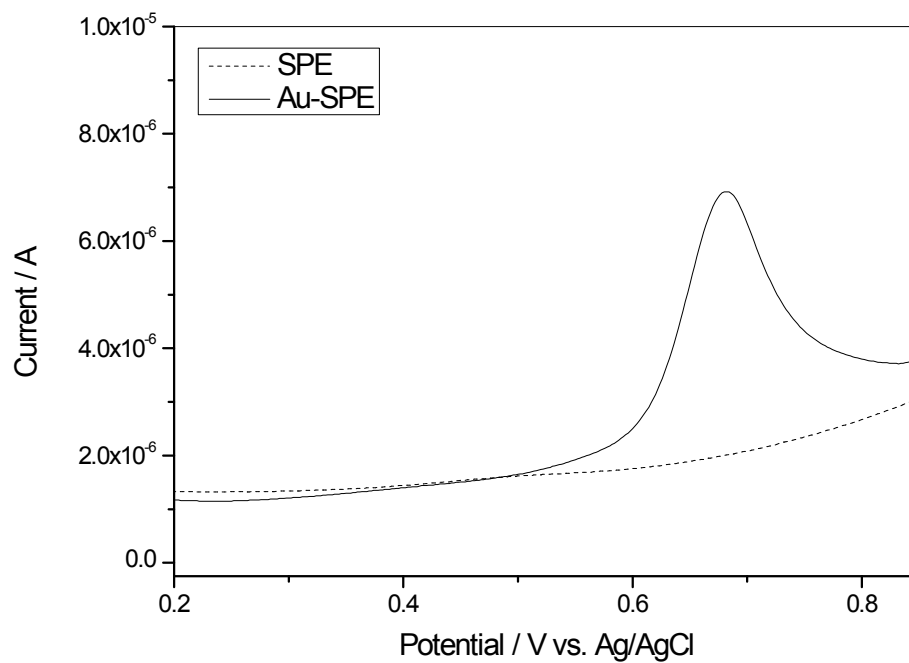

**Fig. S3** SEM images of (A, B) bare SPE and (C, D) Chi-Au-SPE.

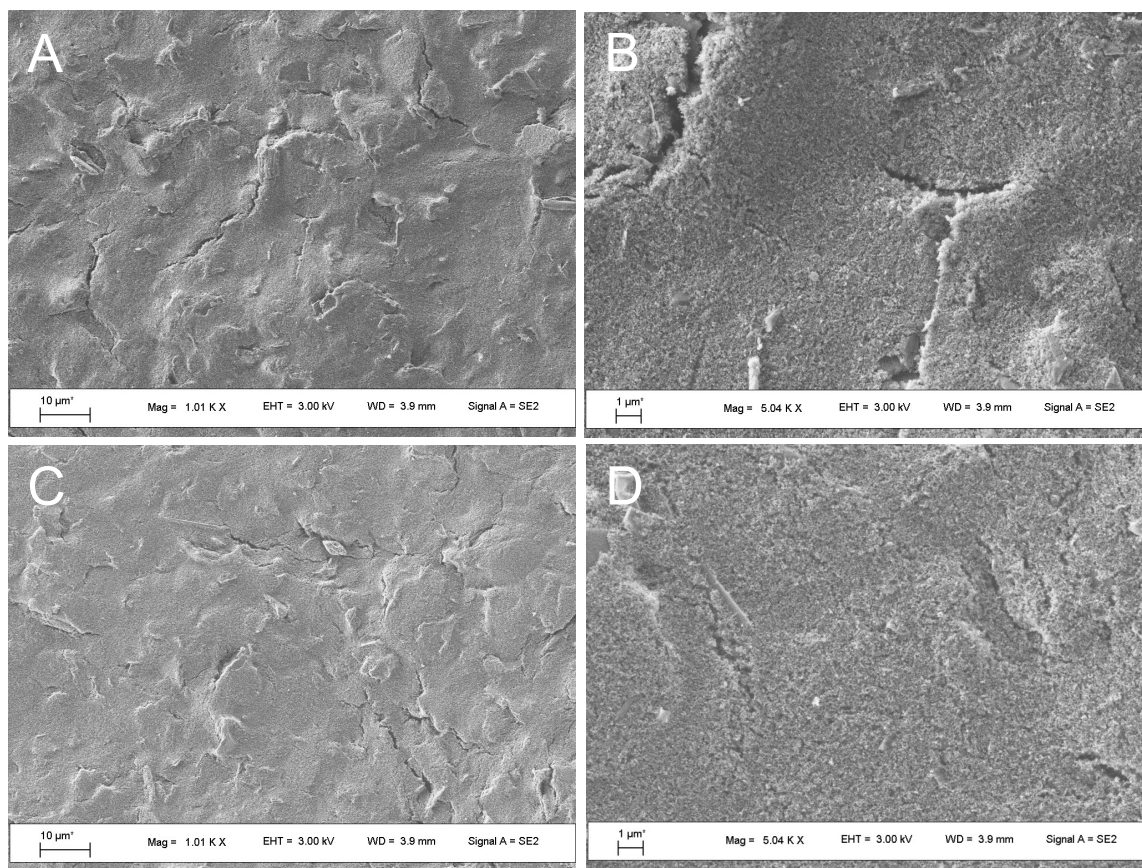

**Fig. S4** XPS spectra of (A) bare SPE and (B) Chi-Au-SPE in the N(1s) region. The N signal was very weak in the XPS spectrum of bare SPE. The XPS spectrum of Chi-Au-SPE in the N(1s) region can be resolved into two peaks. The peaks at 399.4 eV, and 401.4 eV may be assigned to  $\text{NH}_2$  and  $\text{NH}_3^+$ , respectively, which confirms the depositon of chitosan on the SPE.

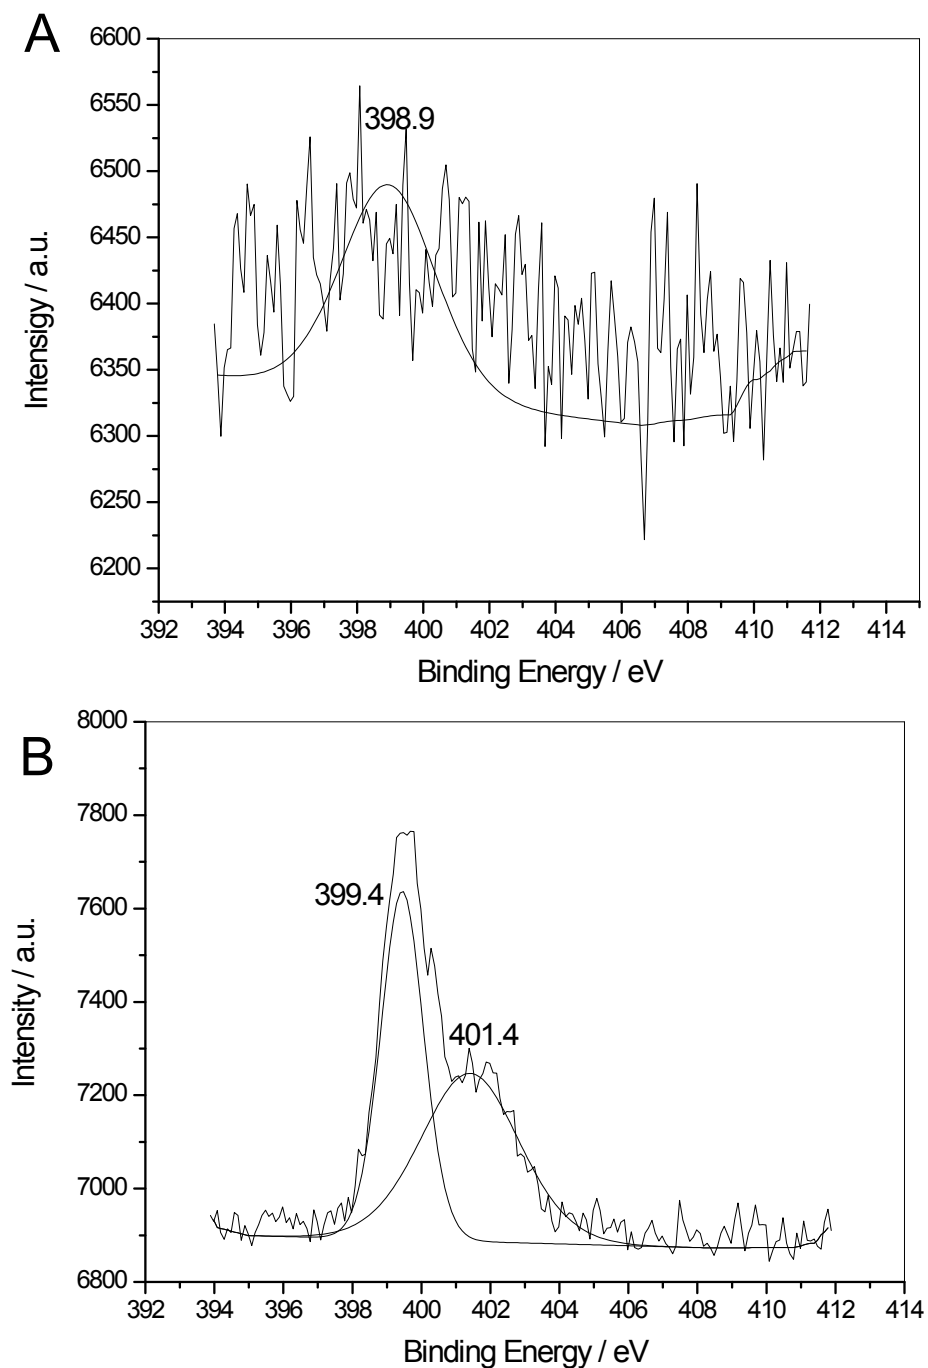

Supplement: c5ay03291a1.pdf [file c5ay03291a1.pdf]
